# Supplementary material for: The role of surface hydroxyl groups on a single-atomic Rh1/ZrO2 catalyst for direct methane oxidation
Source: Royal Society of Chemistry journal article supplement (doi:10.1039/d0cc07514k), 2021-01-01
Supplement: d0cc07514k1.pdf [file d0cc07514k1.pdf]

## Role of Surface Hydroxyl Groups on Single-Atomic Rh<sub>1</sub>/ZrO<sub>2</sub> Catalyst for Direct Methane Oxidation

Gunjoo Kim<sup>a</sup>, Gihun Kwon<sup>a</sup>, and Hyunjoo Lee<sup>a\*</sup>

<sup>a</sup> Department of Chemical and Biomolecular Engineering, Korea Advanced Institute of Science and Technology, Daejeon 34141, South Korea

### Experimental Section

#### Additional Data

Figure S1 ~ S10

Table S1

---

\* Corresponding author. [azhyun@kaist.ac.kr](mailto:azhyun@kaist.ac.kr)

## Experimental Section

### Catalyst Syntheses

Zirconium n-propoxide 14.4 mL (70 wt% in n-propanol; Sigma-Aldrich) was diluted with 38.1 mL of 1-propanol. 20 mL of ammonia water (Duksan) was injected dropwise. This solution was stirred for 1 h and then dried at 85 °C for 12 h. The white powder was collected and calcined at 450 °C for 6 h in air flow to obtain tetragonal ZrO<sub>2</sub>. Rhodium(III) chloride (98% ; Sigma-Aldrich) 4.9 mg was dissolved in 5 mL of anhydrous ethanol (99.9%; Samcheon). 300 mg of zirconia support was dispersed in 10 mL of ethanol. These two solutions were mixed with vigorous stirring and dried at 60 °C. The dried sample was calcined at 400 °C for 1 h in air flow. The obtained Rh/ZrO<sub>2</sub> catalyst was hydrothermally treated in a U-shaped quartz cell. 144.5 sccm of air with 10 % H<sub>2</sub>O was flown at 300 °C for 10, 15, and 20 h each, and they are denoted as RZH\_10, RZH\_15, and RZH\_20, respectively.

### Direct Methane Oxidation

The catalyst 30 mg was ground well and dispersed in 10 mL of targeted concentration of H<sub>2</sub>O<sub>2</sub> aqueous solution, located inside a 60 mL Teflon-coated stainless-steel autoclave. The autoclave was compactly sealed, pressurized with a gas mixture of methane (95 % methane and 5 % He) and O<sub>2</sub> to reach the target pressure (usually 30 bar of CH<sub>4</sub> and 2 bar of O<sub>2</sub>). Then the autoclave was heated to 90 °C with 850 rpm and kept for 30 min. When the reaction ends, the reactor was rapidly cooled with a dry-ice until the temperature reaches below 10 °C to minimize the volatilization of products. The liquid phase products were analyzed by <sup>1</sup>H NMR spectroscopy (400 MHz; Bruker) with solvent suppression method. 1 mL of liquid product was collected and centrifuged. Then 0.7 mL of supernatant was mixed with 0.1 mL D<sub>2</sub>O (99 %; Sigma-Aldrich) and 0.01 mL of 3-(trimethylsilyl)-1-propanesulfonic acid sodium salt (DSS, 97 %; Sigma-Aldrich) solution.

Recycle tests were conducted as following; at the first cycle, the methane conversion was performed at 30 bar of methane gas (95% CH<sub>4</sub> balanced with He), 2 bar of O<sub>2</sub> using 120 mM H<sub>2</sub>O<sub>2</sub> and 30 mg of RZH\_10 catalyst in 10 mL solution at 90 °C for 30 min. The catalysts was then collected and dried at 85 °C. At the second cycle, this catalyst was used again for the methane conversion at the same condition. After the 2<sup>nd</sup> reaction, the catalyst was calcined at 550 °C for 1 h and hydrothermally treated at 300 °C for 10 h. This catalyst was used for the methane conversion again at the same reaction condition.

### Characterizations

The crystalline structure of the catalysts was measured by powder X-ray diffractometer (XRD; SmartLab, RIGAKU). The surface Rh oxidation state of the catalysts was investigated with X-ray photoelectron spectroscopy (XPS; K-alpha, Thermo VG Scientific) with an Al K $\alpha$  X-ray source (12 kV, 3 mA). C 1s peak calibration was conducted, locating the highest intensity of peak at 284.8 eV. The BET surface area of the catalysts was analyzed by a Tristar II 3020 (Micromeritics). Transmission electron microscope (TEM) images of catalysts before and after hydrothermal treatment were taken with Tecnai G2 F30 S-twin model (FEI) at 300 kV. To further confirm the highly oxidized state of Rh and single atomic structure of the catalyst, X-ray absorption near edge structure (XANES) and extended X-ray absorption fine structure (EXAFS) of Rh K-edge were measured from Pohang Light Source (PLS) 10C beamline. The Rh K-edge spectra were obtained by a fluorescence mode, using a passivated implanted planar silicon (PIPS) detector (Canberra). The XANES and EXAFS data were processed with ATHENA software.

The catalysts were also analyzed with diffuse reflectance infrared Fourier-transform spectroscopy (DRIFTS; Nicolet iS-50, Thermo Scientific). The catalyst 20 mg was ground well with 80 mg of KBr, then loaded in a sample cup and set into a DRIFT cell. The temperature was raised to 300 °C by 5 °C/ min with Ar flow, while monitoring the OH peaks. The DRIFTS measurement was also performed with CO adsorption. The catalyst was pretreated in Ar for 1 h at 100 °C, then cooled to room temperature. 2 % CO with Ar balance was flown for 15 min at room temperature for CO adsorption. The DRIFT spectra were then collected under evacuation. For CH<sub>4</sub> adsorption, 5 % CH<sub>4</sub> with Ar balance was flown for 15 min and the DRIFT spectra were collected at 90 °C.

## Additional Data

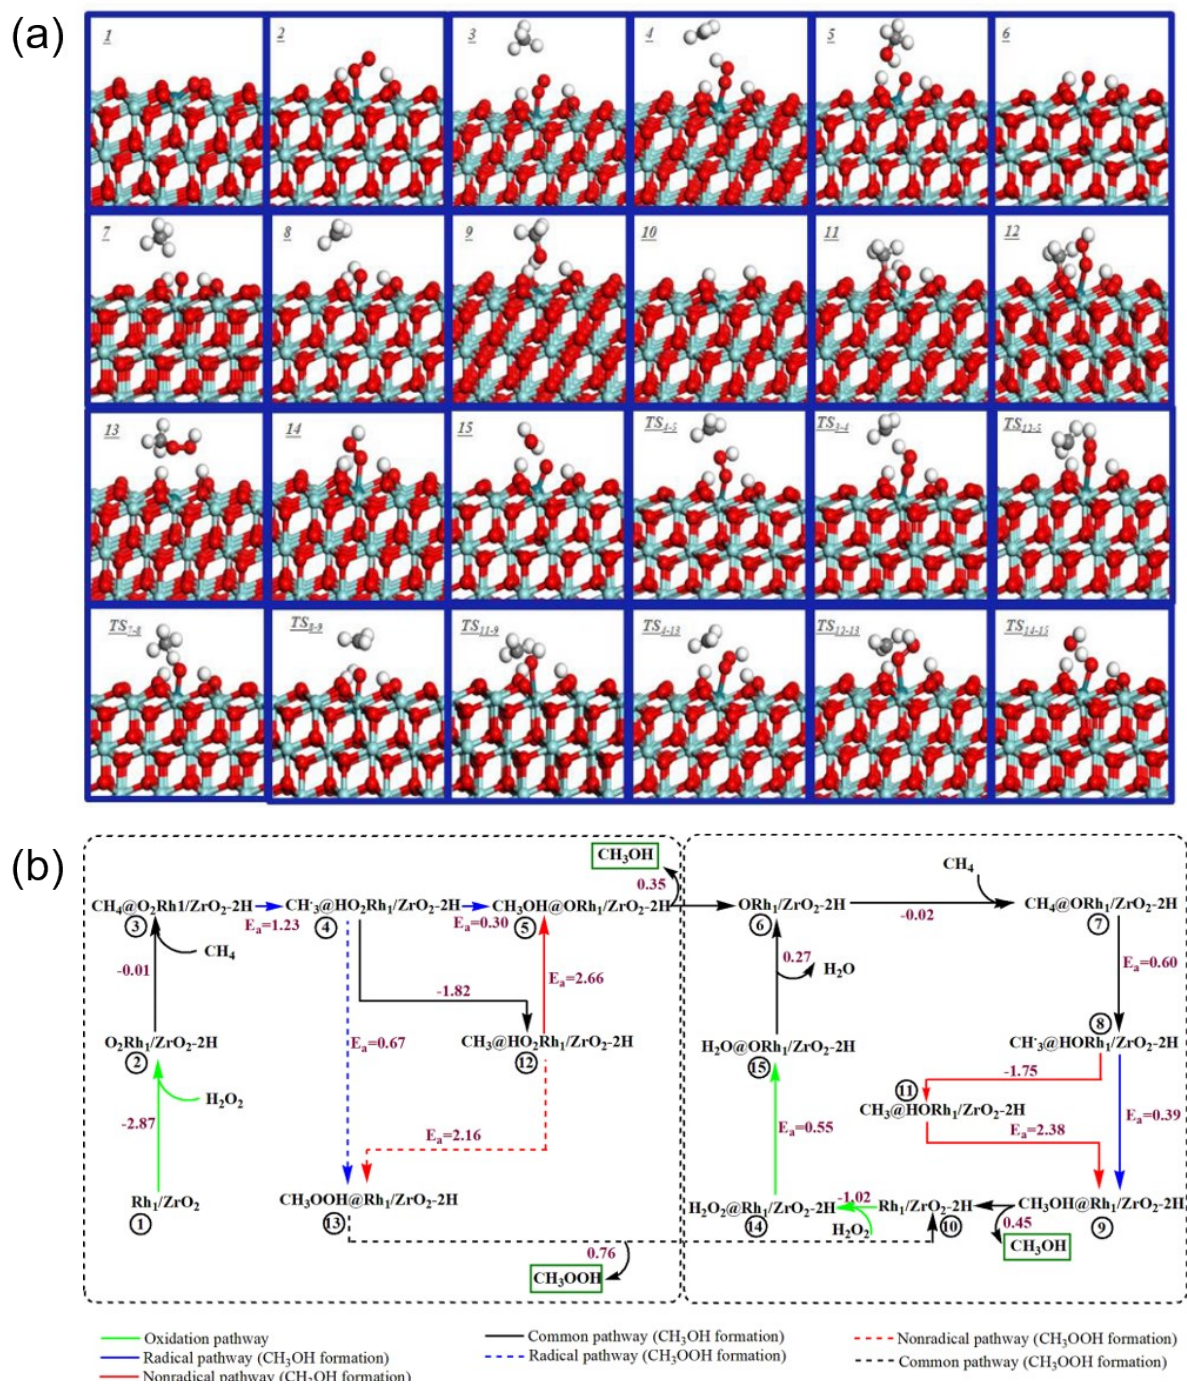

**Figure S1.** (a) The structures of intermediates in direct methane oxidation on Rh<sub>1</sub>/ZrO<sub>2</sub>. (b) Reaction network for the methane conversion on the Rh<sub>1</sub>/ZrO<sub>2</sub>. (adapted from ‘K. Harrath, X. Yu, H. Xiao and J. Li, ACS Catalysis, 2019, 9, 8903-8909’ with permission)

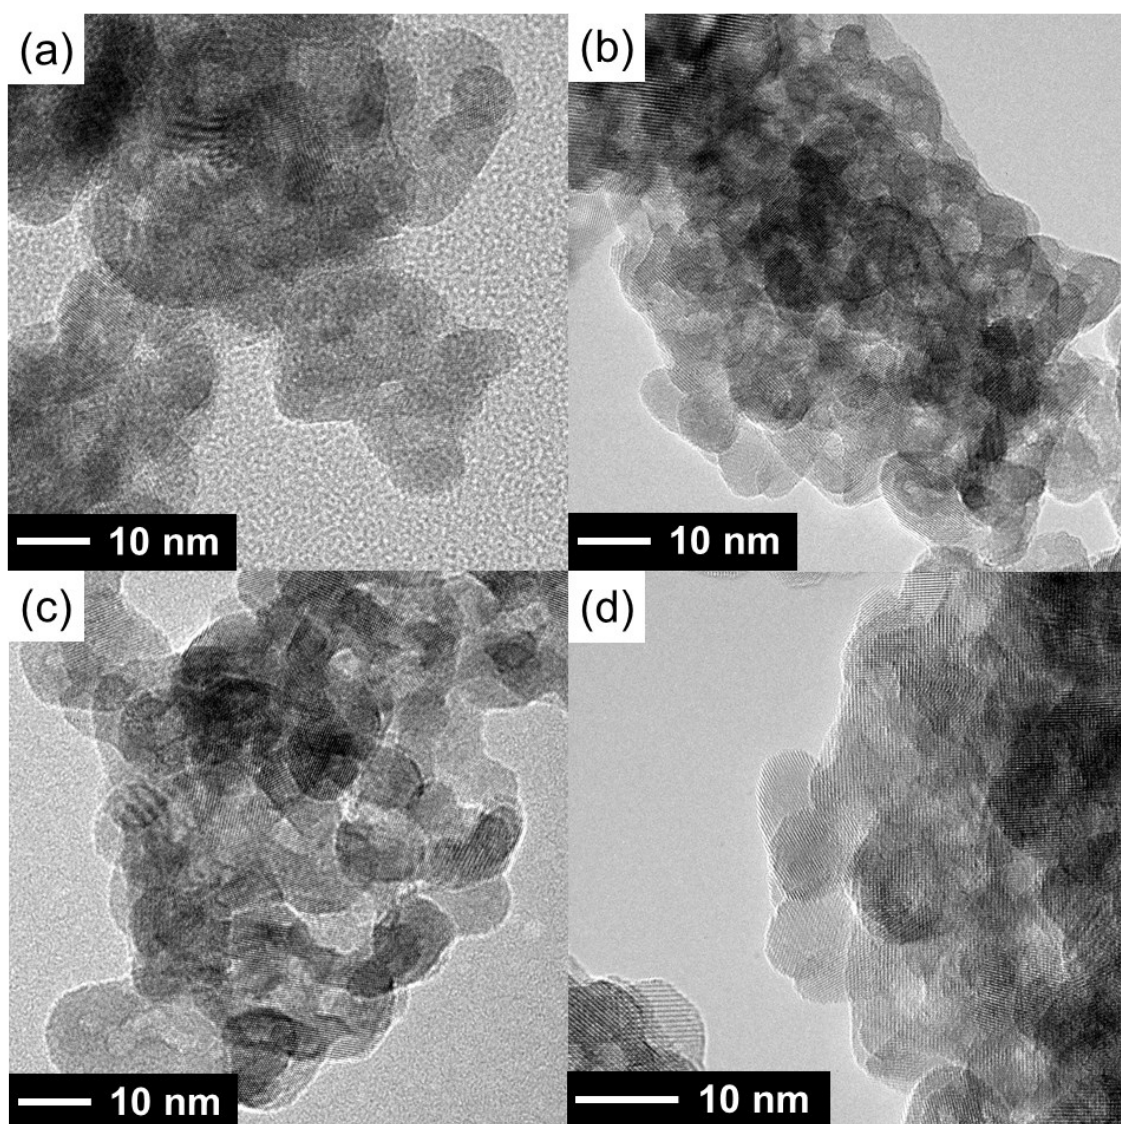

**Figure S2.** TEM images of (a) Rh<sub>1</sub>/ZrO<sub>2</sub> (RZ), (b) Rh<sub>1</sub>/ZrO<sub>2</sub> hydrothermally treated for 10 h (RZH\_10), (c) Rh<sub>1</sub>/ZrO<sub>2</sub> hydrothermally treated for 15 h (RZH\_15), and (d) Rh<sub>1</sub>/ZrO<sub>2</sub> hydrothermally treated for 20 h (RZH\_20).

**Table. S1** BET surface area and the analyses of Rh germinal peaks obtained in DRIFTS (Figure 1a) of RZ, RZH\_10, RZH\_15, and RZH\_20. The angle between two CO molecules adsorbed on Rh single sites can be calculated by comparing each area of the symmetric and asymmetric peaks.<sup>S1-S3</sup>

| Sample | BET Surface Area (m <sup>2</sup> /g) | Symmetric (cm <sup>-1</sup> ) | A <sub>sym</sub> <sup>a</sup> | Asymmetric (cm <sup>-1</sup> ) | A <sub>asym</sub> <sup>a</sup> | 2α(°) <sup>b</sup> |
|--------|--------------------------------------|-------------------------------|-------------------------------|--------------------------------|--------------------------------|--------------------|
| RZ     | 74.1                                 | 2085                          | 18.5                          | 2010                           | 17.0                           | 87.6               |
| RZH_10 | 69.7                                 | 2085                          | 25.2                          | 2010                           | 28.1                           | 93.1               |
| RZH_15 | 65.4                                 | 2085                          | 22.6                          | 2010                           | 22.4                           | 89.8               |
| RZH_20 | 66.1                                 | 2085                          | 23.0                          | 2010                           | 23.7                           | 90.8               |

<sup>a</sup> The area of the symmetric or asymmetric peaks.

<sup>b</sup> The angle between the adsorbed CO molecules.  $A_{\text{asym}} / A_{\text{sym}} = \tan^2\alpha$

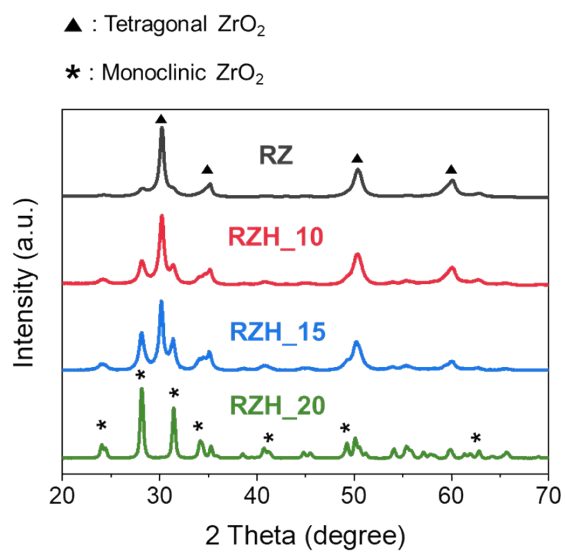

**Figure S3.** XRD patterns of RZ, RZH\_10, RZH\_15, and RZH\_20. The triangle (▲) indicates tetragonal phase of ZrO<sub>2</sub>, and the star (\*) indicates monoclinic phase of ZrO<sub>2</sub>.

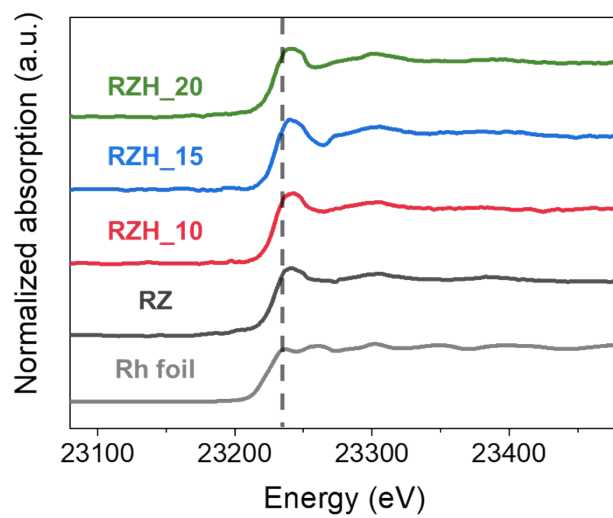

**Figure S4.** Rh K edge XANES spectra for RZ, RZH\_10, RZH\_15, RZH\_20, and Rh foil.



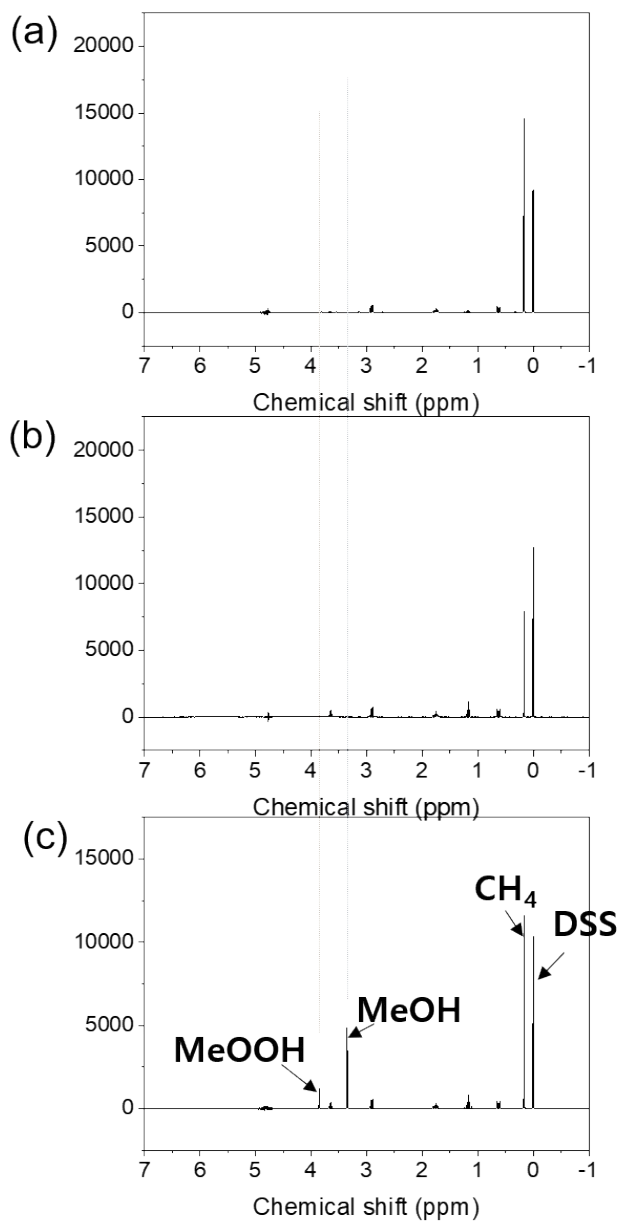

**Figure S5.**  $^1\text{H}$  NMR data (a) in the absence of the catalyst, (b) in the absence of  $\text{H}_2\text{O}_2$ , (c) in the presence of both the catalyst (RZH\_10) and  $\text{H}_2\text{O}_2$ . The reaction was performed at 30 bar of 95%  $\text{CH}_4/\text{He}$ , 2 bar of  $\text{O}_2$ , 120 mM of  $\text{H}_2\text{O}_2$ , and 90  $^\circ\text{C}$  for 30 min using the catalyst 30 mg in 10 mL aqueous solution.

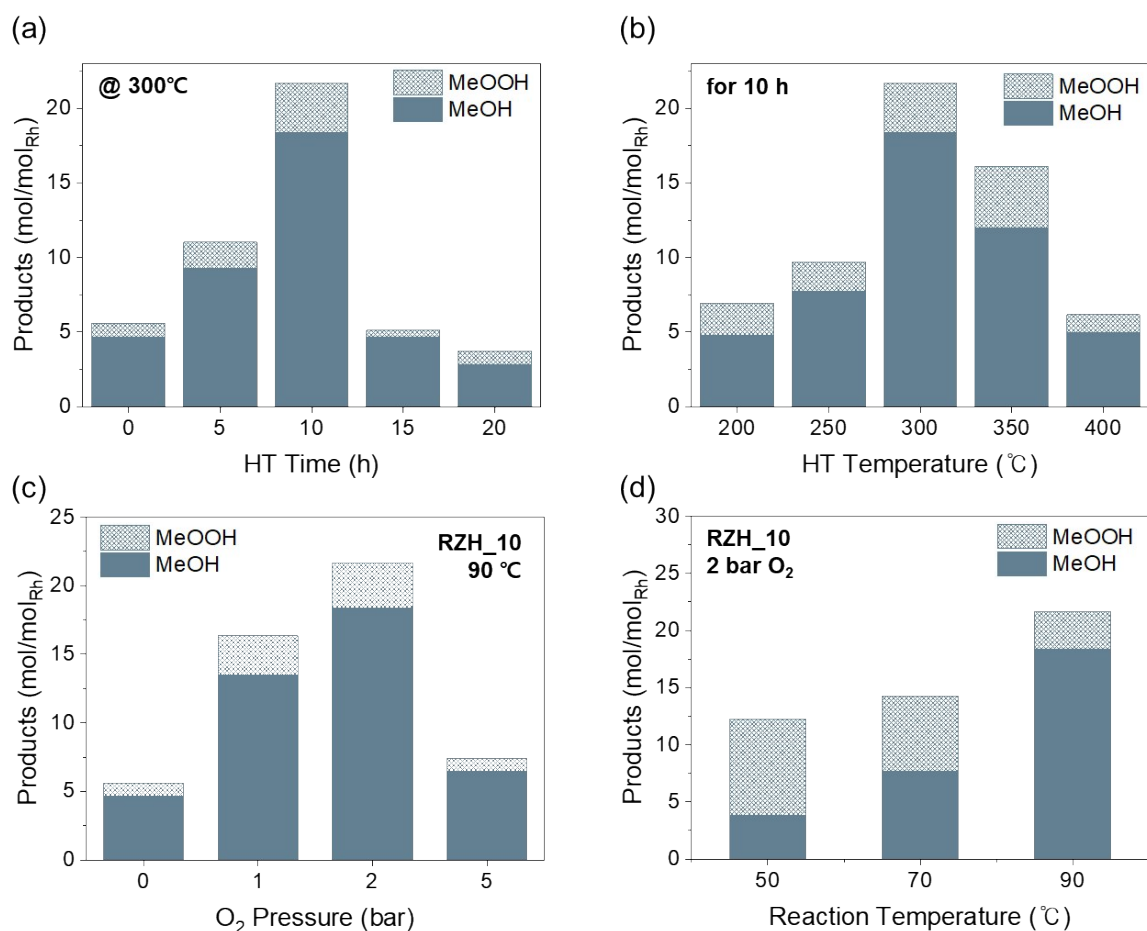

**Figure S6.** Production of methane oxygenates for various (a) times of hydrothermal treatment, (b) temperatures of hydrothermal treatment, (c) O<sub>2</sub> pressure, and (d) reaction temperatures.

Reaction conditions for (a) and (b): 30 bar of 95 % CH<sub>4</sub>/He, 2 bar of O<sub>2</sub>, 90 °C, 30 min, 120 mM H<sub>2</sub>O<sub>2</sub> and catalyst 30 mg in 10 mL solution.

Reaction conditions for (c): Total pressure of gas is fixed with 32 bar (balanced with 95 % CH<sub>4</sub>/He), 90 °C, 30 min, 120 mM H<sub>2</sub>O<sub>2</sub> and 30 mg of RZH\_10 in 10 mL solution.

Reaction condition for (d): 30 bar of 95 % CH<sub>4</sub>/He, 2 bar of O<sub>2</sub>, 30 min, 120 mM H<sub>2</sub>O<sub>2</sub> and 30 mg of RZH\_10 in 10 mL solution.

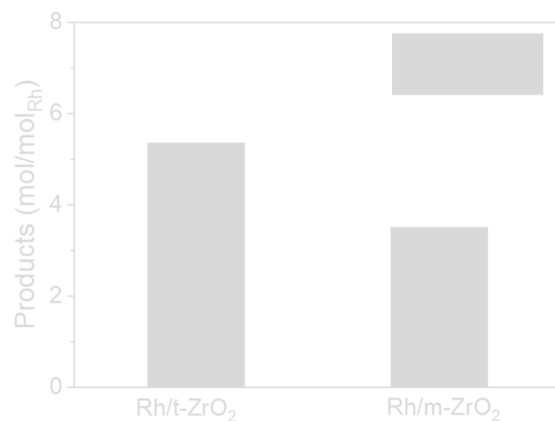

**Figure S7.** Reaction results for different crystalline structure of ZrO<sub>2</sub> support (t-ZrO<sub>2</sub> denotes tetragonal structure, and m-ZrO<sub>2</sub> denotes monoclinic structure). Reaction condition: 30 bar of 95 % CH<sub>4</sub>/He, 30 min, 90 °C, 120 mM H<sub>2</sub>O<sub>2</sub> and 30 mg of catalysts in 10 mL solution.

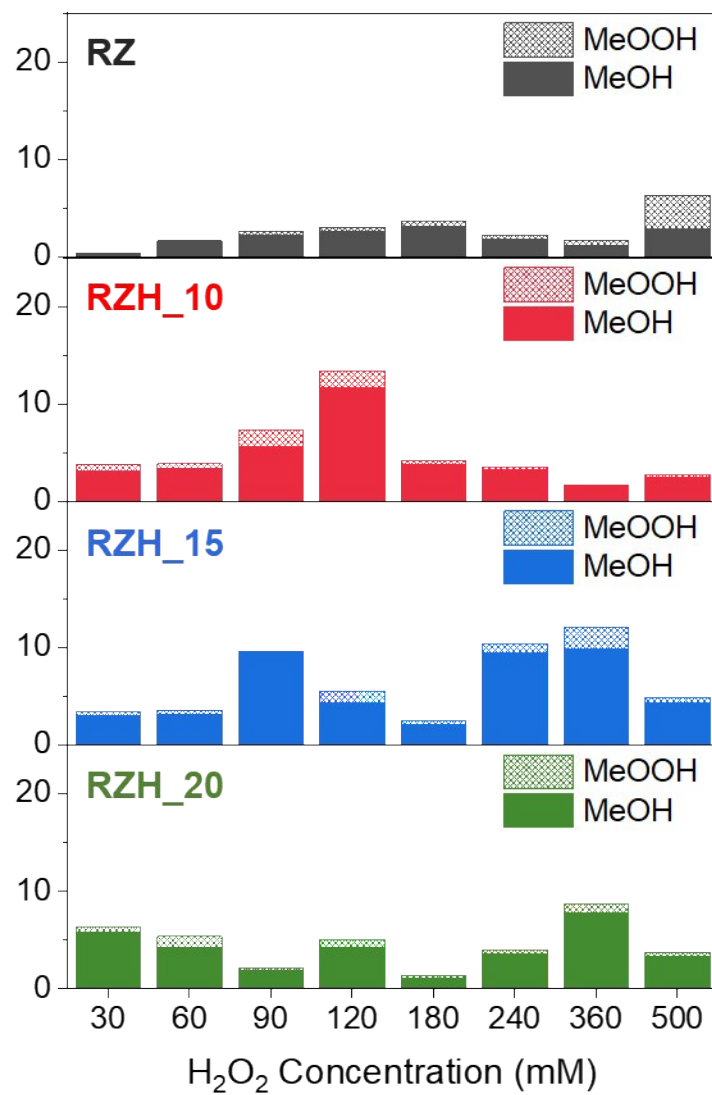

**Figure S8.** Production of methane oxygenates for various H<sub>2</sub>O<sub>2</sub> concentrations in the absence of O<sub>2</sub>. Reaction condition: 32 bar of 95% CH<sub>4</sub>/He, 90 °C, 30 min, and catalyst 30 mg in 10 mL solution.

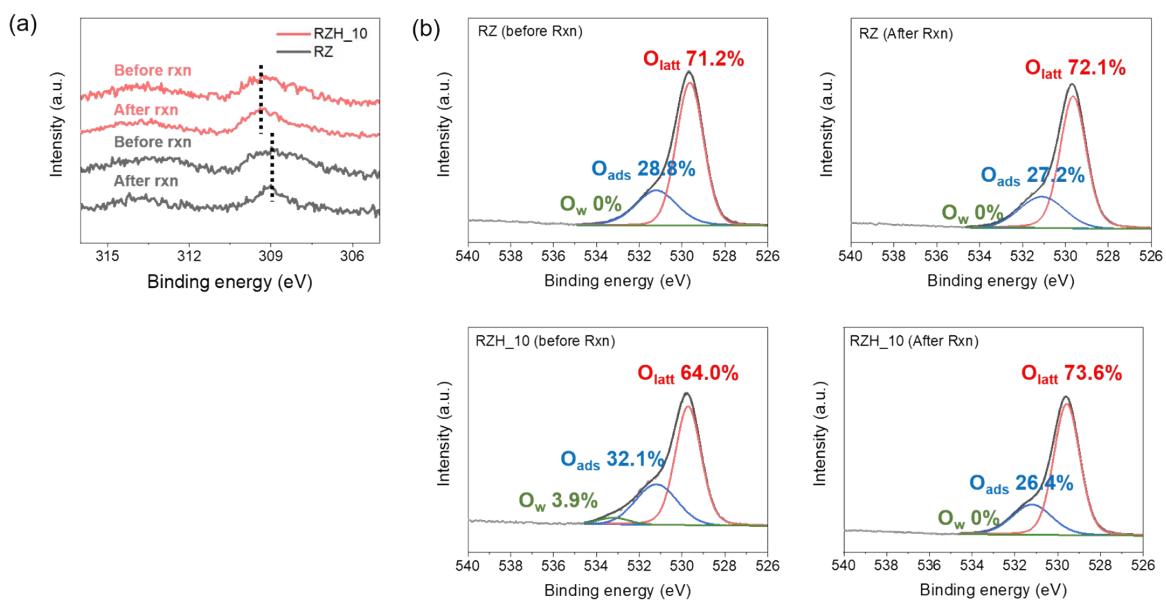

**Figure S9.** XPS (a) Rh 3d and (b) O 1s before and after the methane oxidation for RZ (no hydrothermal treatment) and RZH\_10 (hydrothermally treated for 10 h prior to the reaction)

▲ : Tetragonal ZrO<sub>2</sub>

\* : Monoclinic ZrO<sub>2</sub>

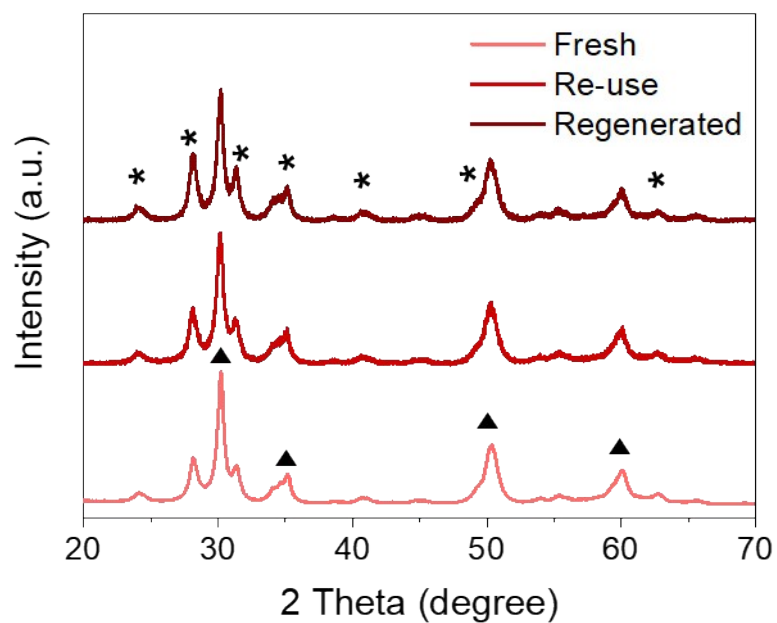

**Figure S10.** XRD result of fresh, re-use, and regenerated RZH\_10 sample. The triangle (▲) denotes tetragonal phase of ZrO<sub>2</sub>, with star (\*) denotes monoclinic crystalline phase of ZrO<sub>2</sub>.

## REFERENCES

- S1. Lang, R.; Li, T.; Matsumura, D.; Miao, S.; Ren, Y.; Cui, Y. T.; Tan, Y.; Qiao, B.; Li, L.; Wang, A.; Wang, X.; Zhang, T., Hydroformylation of Olefins by a Rhodium Single-Atom Catalyst with Activity Comparable to  $\text{RhCl}(\text{PPh}_3)_3$ . *Angew. Chem. Int. Ed.* **2016**, *55* (52), 16054-16058.
- S2. Jeong, H.; Lee, G.; Kim, B.-S.; Bae, J.; Han, J. W.; Lee, H., Fully Dispersed Rh Ensemble Catalyst To Enhance Low-Temperature Activity. *J. Am. Chem. Soc.* **2018**, *140* (30), 9558-9565.
- S3. Kwon, Y.; Kim, T. Y.; Kwon, G.; Yi, J.; Lee, H., Selective Activation of Methane on Single-Atom Catalyst of Rhodium Dispersed on Zirconia for Direct Conversion. *J. Am. Chem. Soc.* **2017**, *139* (48), 17694-17699.
